# Supplementary figures and images for: Organoimido-polyoxometalates as polymer pendants
Source: Royal Society of Chemistry journal article supplement (doi:10.1039/b005022i), 2000-01-01

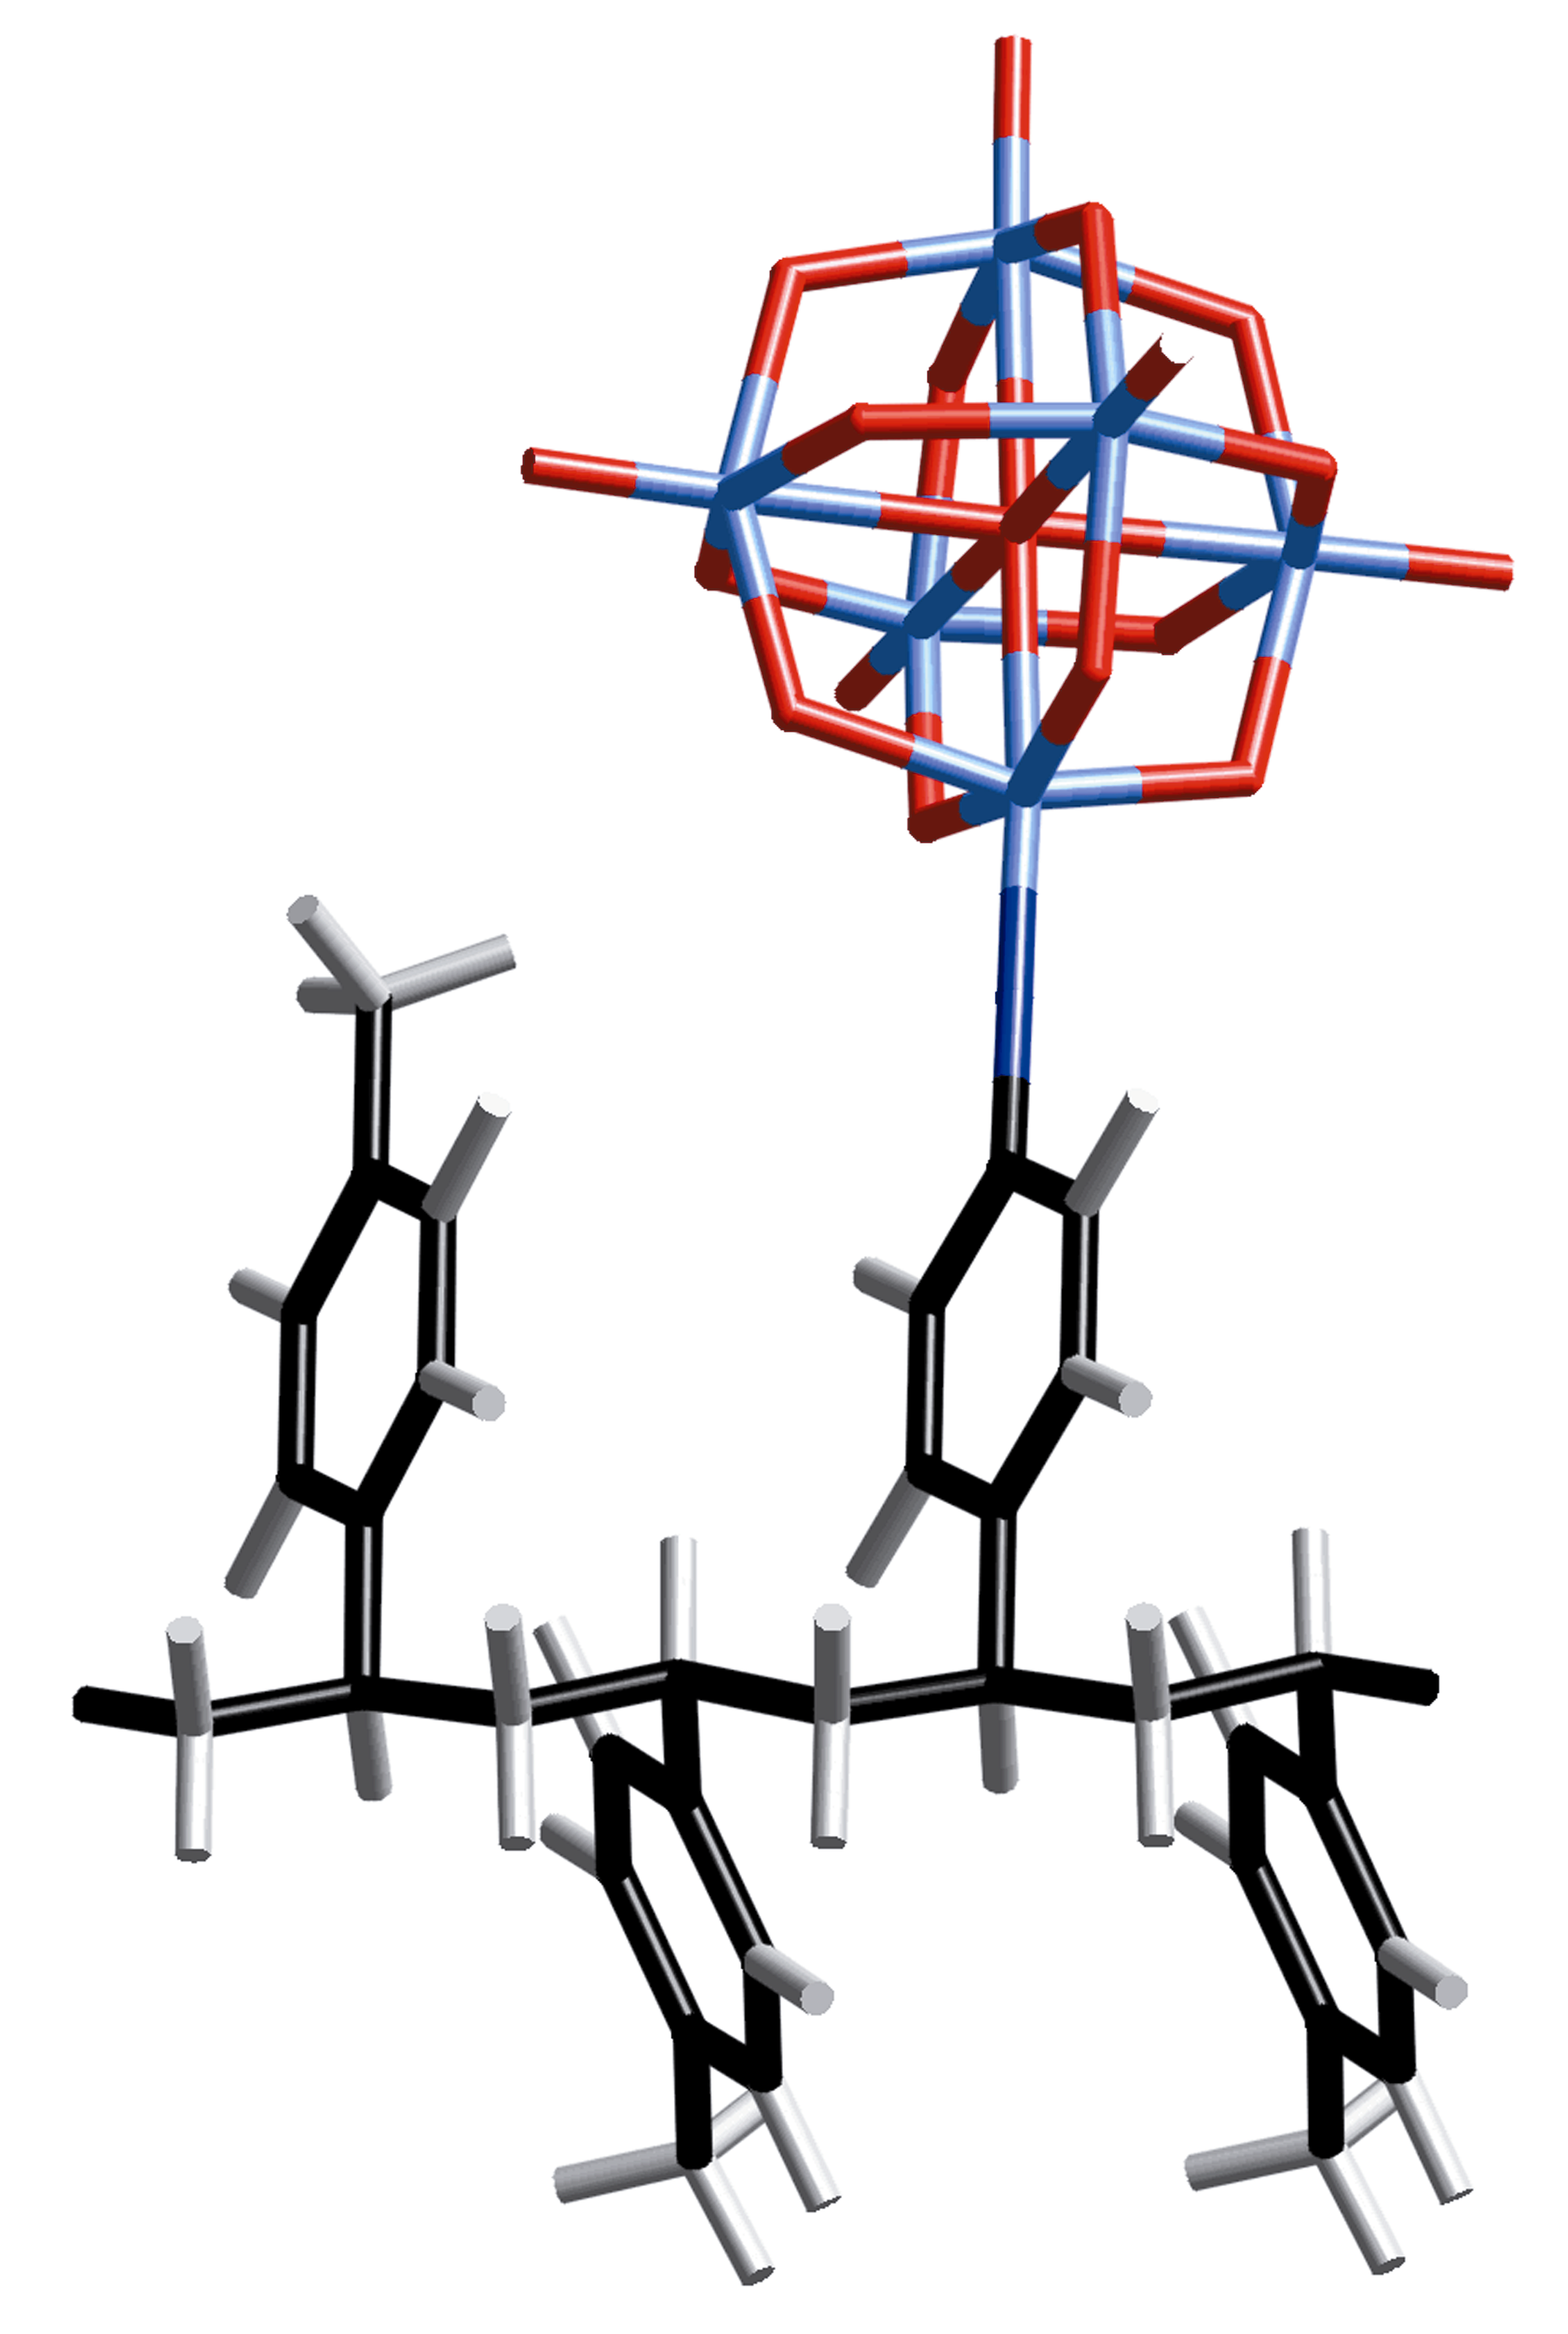

Supplement: b005022i.doc [file b005022i.doc]
